# Supplementary material for: A Rapid, Sensitive, Low-Cost Assay for Detecting Hydrogenotrophic Methanogens in Anaerobic Digesters Using Loop-Mediated Isothermal Amplification
Source: MDPI journal article supplement (doi:10.3390/microorganisms8050740), 2020-05-15
Supplement: s1 [file s1]

**Table S1.** Sanger sequencing results of the PCR products for aEF-2 genes of selected positive controls.

| Sample ID# | Sequence 5'-3'                                                                                                                                                                                                                                                                                                                | Primer used                             | BlastN results                                    |
|------------|-------------------------------------------------------------------------------------------------------------------------------------------------------------------------------------------------------------------------------------------------------------------------------------------------------------------------------|-----------------------------------------|---------------------------------------------------|
| PCR4_Mco   | atGGnAcaCaTGaACaAATTAGAAACATGGGTATCTGTGCTCACATTGACCACGGTAAACACATTATCA<br>GACAACCTTGCTTGCAAGGAGCAGGTATGATCTCCAAAGAATTAGCTGGAGACCAGCTTGCACTTGACTT<br>CGATGAAGAAGAAGCTGCAAGAGGTATCACAATCTACGCTGCAAAACGTTTCAATGGTACACGAATACA<br>GCGGAAAAGAGTACTTAATCACTTAATCGATACCCCTGGTCACGTTGACTTTGGTGGTGACGTTACAA<br>GAGCAATGAGA               | F3_aEF2_Mco<br>5'ATGGGAAGAAAGCAAAAATG3' | <i>Methanococcus maripaludis</i>                  |
| PCR5_Mcu   | gnrGTGacCCGCGCCaTGCGcnGCGGTGnGACGGCGCCGTCGTCTGGTGGACGCGGTCGAGGGGAC<br>CATGCCCCAGACGGAGACGGTGCTCCGGCAGGCCTTgAagGAagGCGTCCGCCCGGTTCTCTTCATCA<br>ACAAGGTGACCCGGCTGGTCAACGAGCTGAAGGTGGACGACGAGGAGATGCAGATCCGCCTCGCGA<br>AGGTGATCGACAAGGTCAACAAGCTGATCAAGGGCATGAACgAaaAA                                                           | F3_aEF2_Mcu<br>TAYCTBATCAACATGATYAT3'   | 5' <i>Methanoculleus marisnigri</i>               |
| PCR6_Mth   | ggtrntaGTGgCCcaCATTGACcaCGGGAAAAcACACTTTcaGACAACTCCTGGCTGGTGCAGGGaTGATC<br>TCCGCCGAACGTGGCCGGGATCAGCGCTTCCTTGACTTCGACGAACAGGAACAGGCAAGGGGTATCA<br>CCATTGACGTGCAAACTGCTCAATGGTCCACTCCTACGAGGGAAATGAATACCTCATAAACCTCATC<br>GACACACCAGGTACGTTGACTTCGGGGGGGACGTTACAAGGGCCATGAGGGCCGTGGACGGTGCA<br>GTTGTTGTCGTATGCGCCGTTGAGGnnaTAA | F3_aEF2_Mth<br>5'ATTAAGGAGCTCATGTACCA3' | <i>Methanothermobacter<br/>thermautotrophicus</i> |

# - see Figure 1



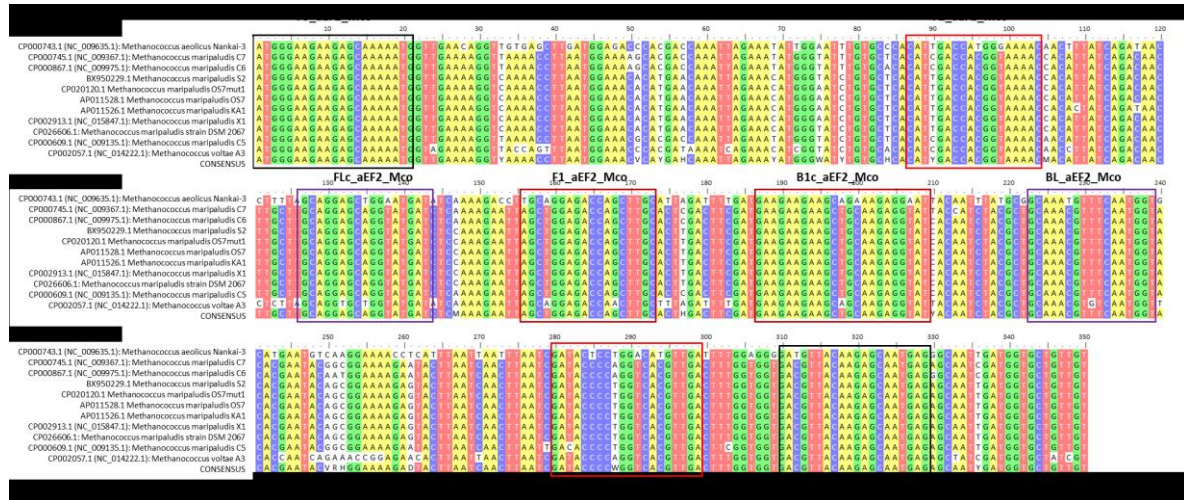

**Figure S1.** Alignments of aEF-2 genes from selected genera of hydrogenotrophic methanogens used to design the LAMP primers. COD designated samples originate from a study published by (Tao et al. 2019). (a) *Methanoculleus* sp., (b) *Methanothermobacter* sp., (c) *Methanobrevibacter* sp., (d) *Methanococcus* sp.
